# Supplementary material for: Source Sector and Region Contributions to Black Carbon and PM 2.5 in the Arctic
Source: Copernicus journal article supplement (doi:10.5194/acp-2018-65), 2018-02-14
Supplement: Supplementary file 1 [file acp-2018-65-supplement.pdf]

# Supplemental Materials for Source Sector and Region Contributions to Black Carbon and PM<sub>2.5</sub> in the Arctic

Negin Sobhani<sup>1,2</sup>, Sarika Kulkarni<sup>2,3</sup>, and Gregory R. Carmichael<sup>2</sup>

<sup>1</sup> National Center for Atmospheric Research, Boulder (NCAR), Colorado, USA

5 <sup>2</sup> Center for Global and Regional Environmental Research (CGRER), University of Iowa, Iowa City, Iowa, USA

<sup>3</sup> California Air Resources Board (CARB), Sacramento, California, USA

*Correspondence to:* Negin Sobhani ([negins@ucar.edu](mailto:negins@ucar.edu))

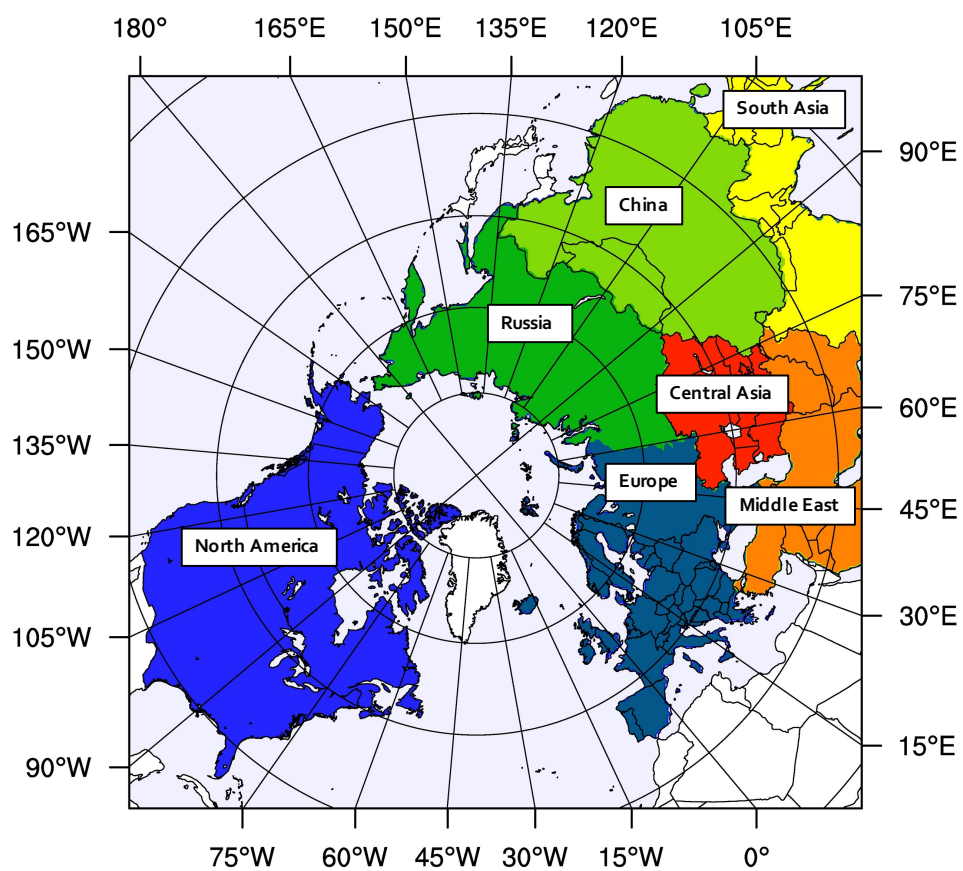

Figure SM 1: WRF-STEM modeling domain setup and source regions defined for this study.

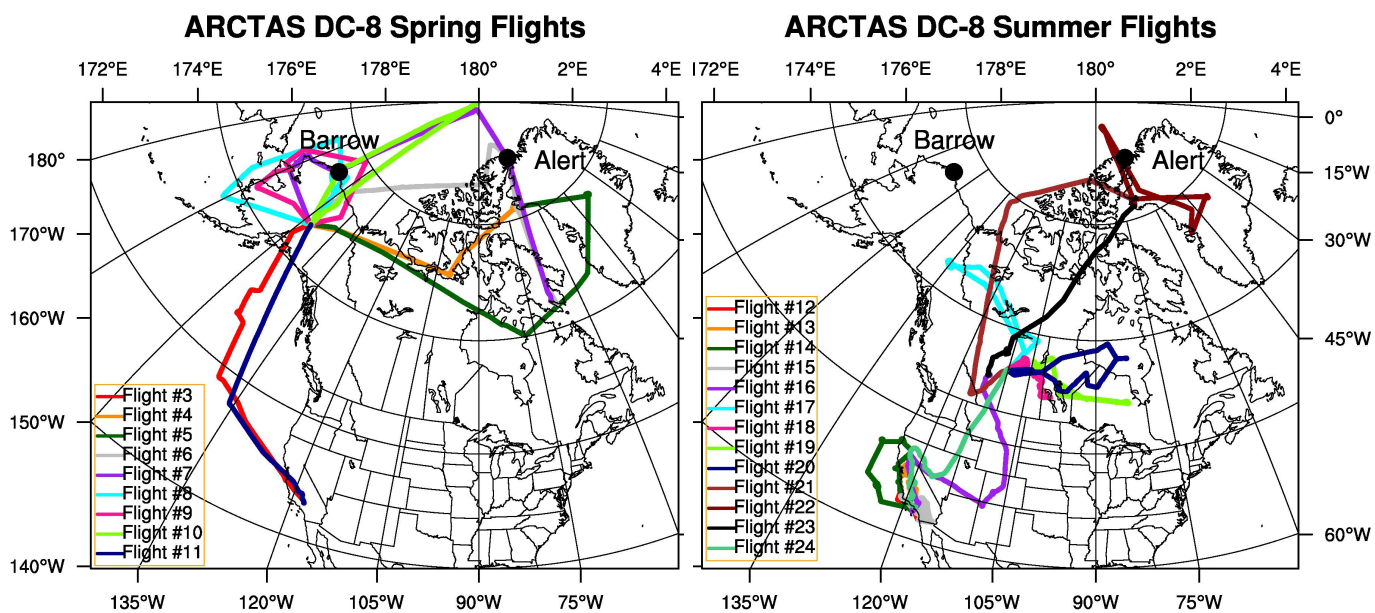

5 Figure SM 2: NASA ARCTAS DC-8 flight tracks during a) Spring 2008 and b) Summer 2008.

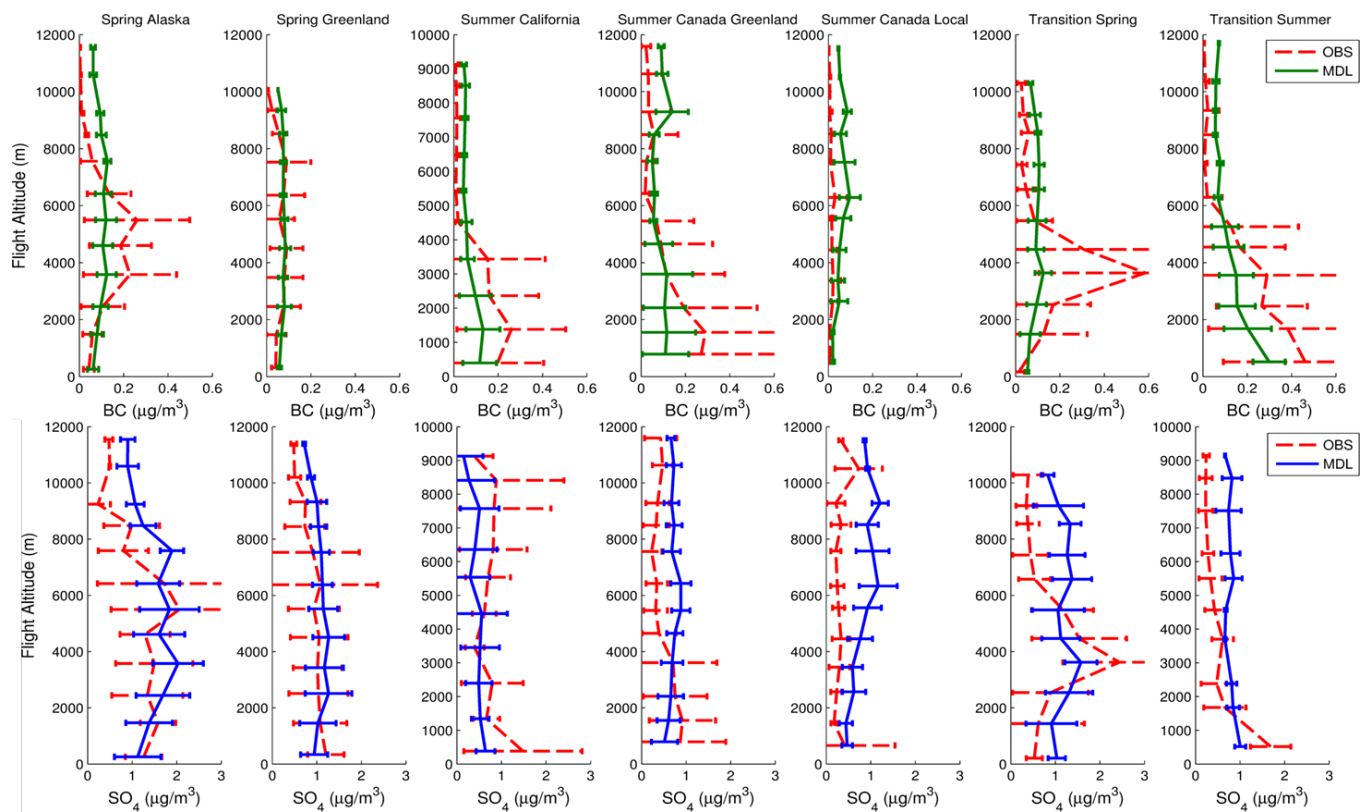

Figure SM 3: Vertical profile and comparison of STEM model aerosols with ARCTAS DC8 aircraft observations.



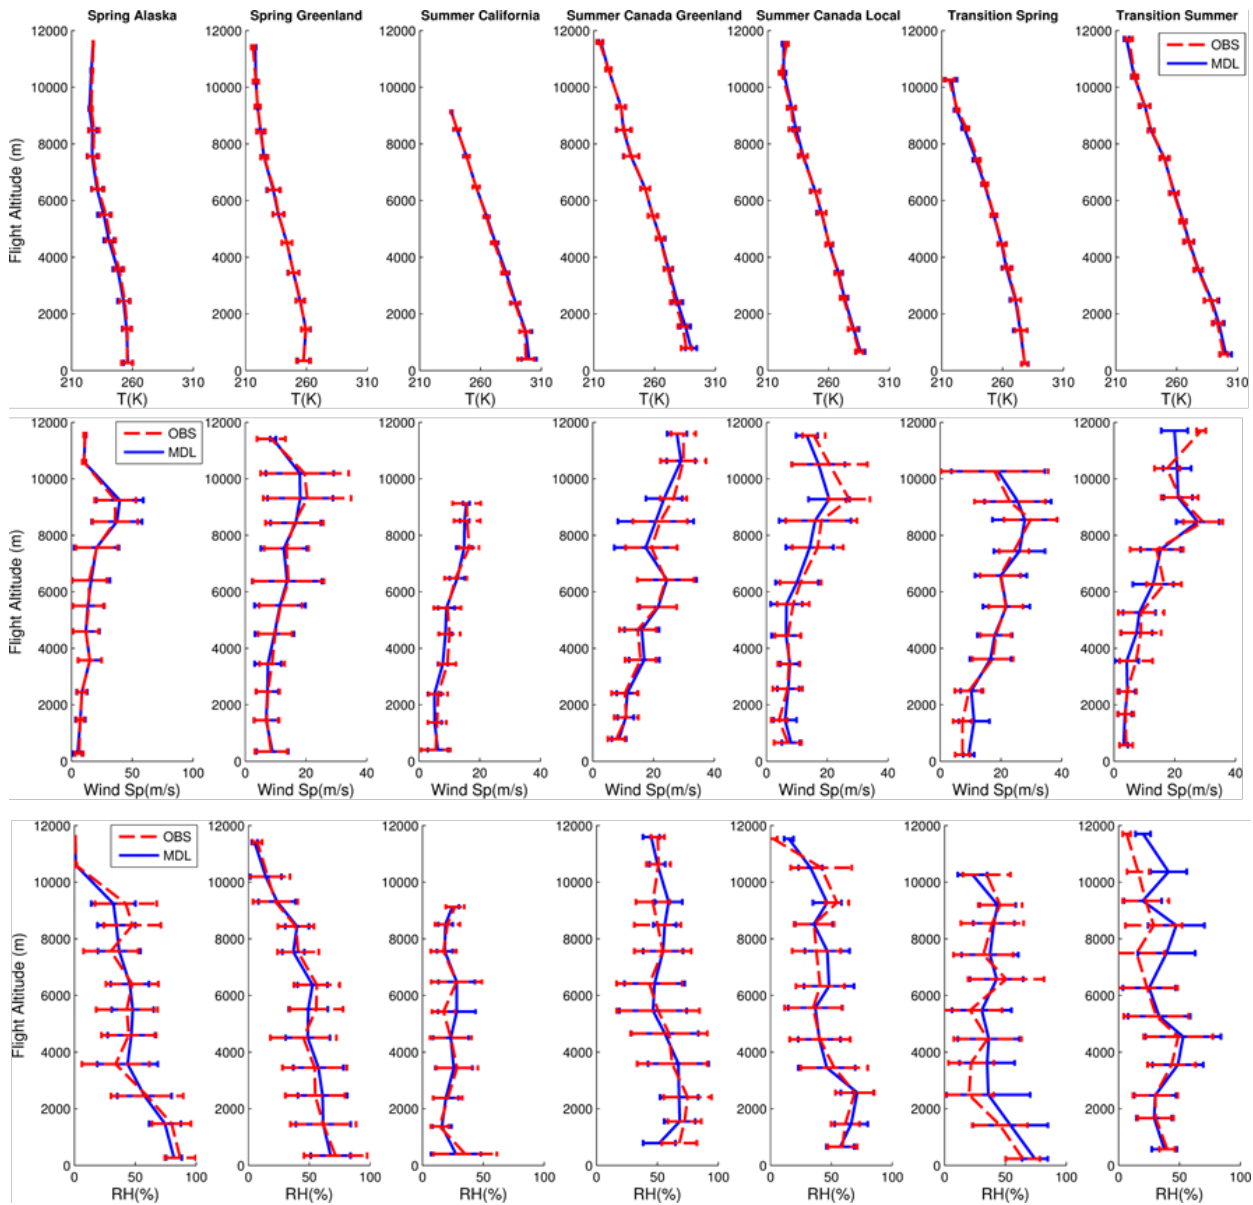

Figure SM 4: Vertical profile and comparison of simulated vs measured metrological variables for ARCTAS flight categories.

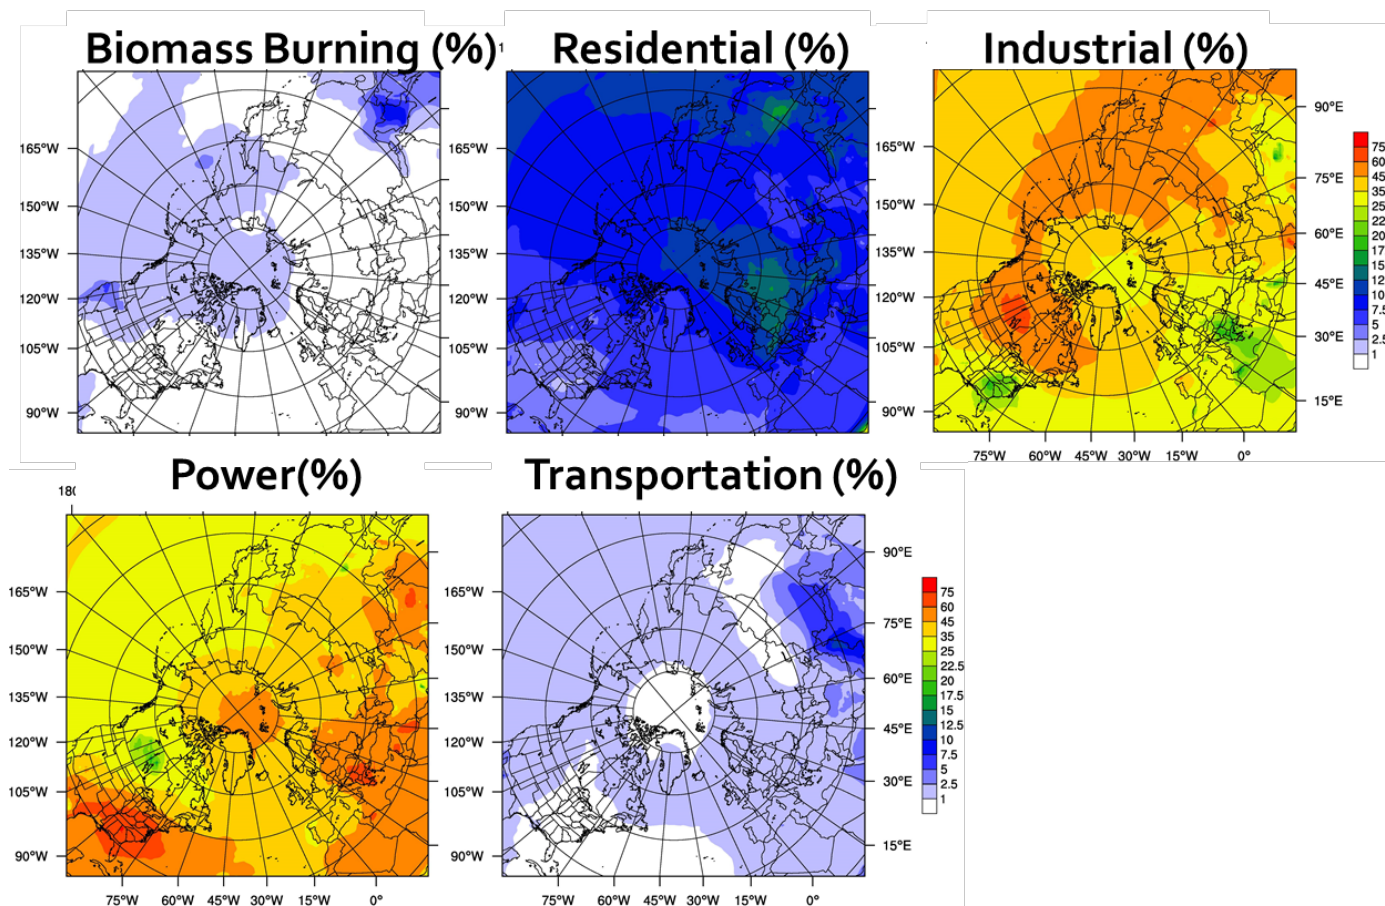

Figure SM 5: Spatial distribution of source sector contributions (%) to annual  $\text{SO}_4$  surface concentration

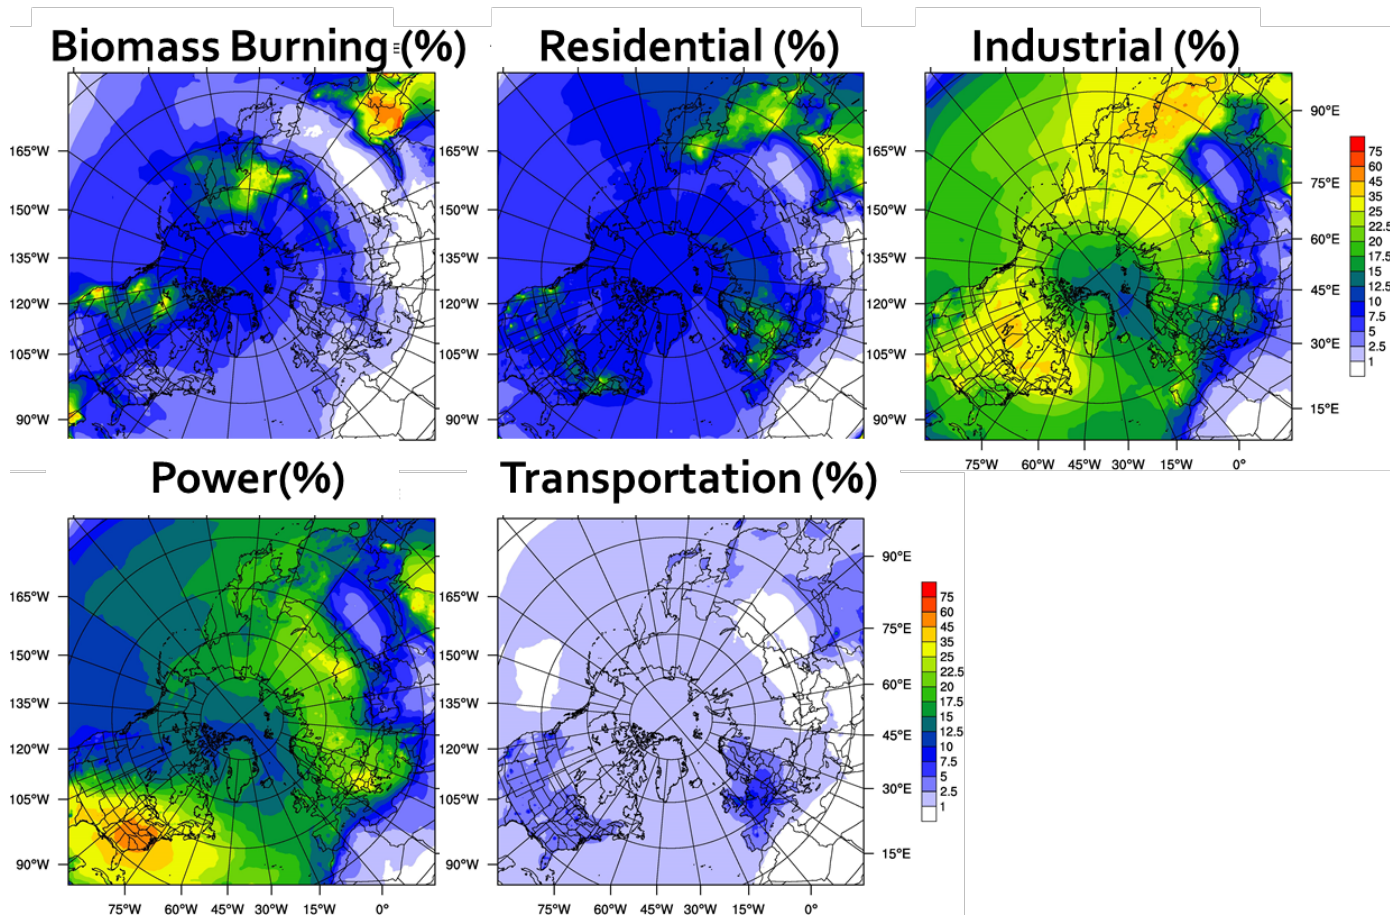

Figure SM 6: Spatial distribution of source sector contributions (%) to annual PM<sub>2.5</sub> surface concentration



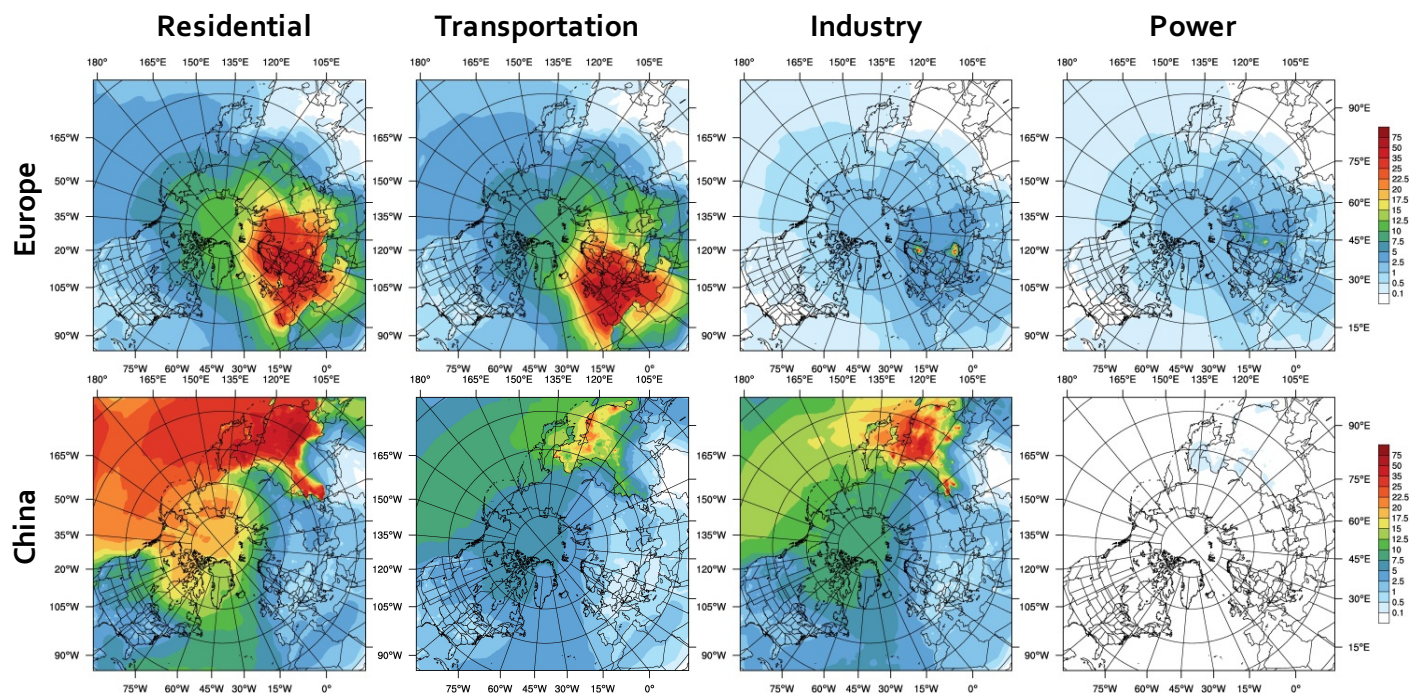

Figure SM 7: % contributions of different sectors from Europe and China to surface BC– annual average

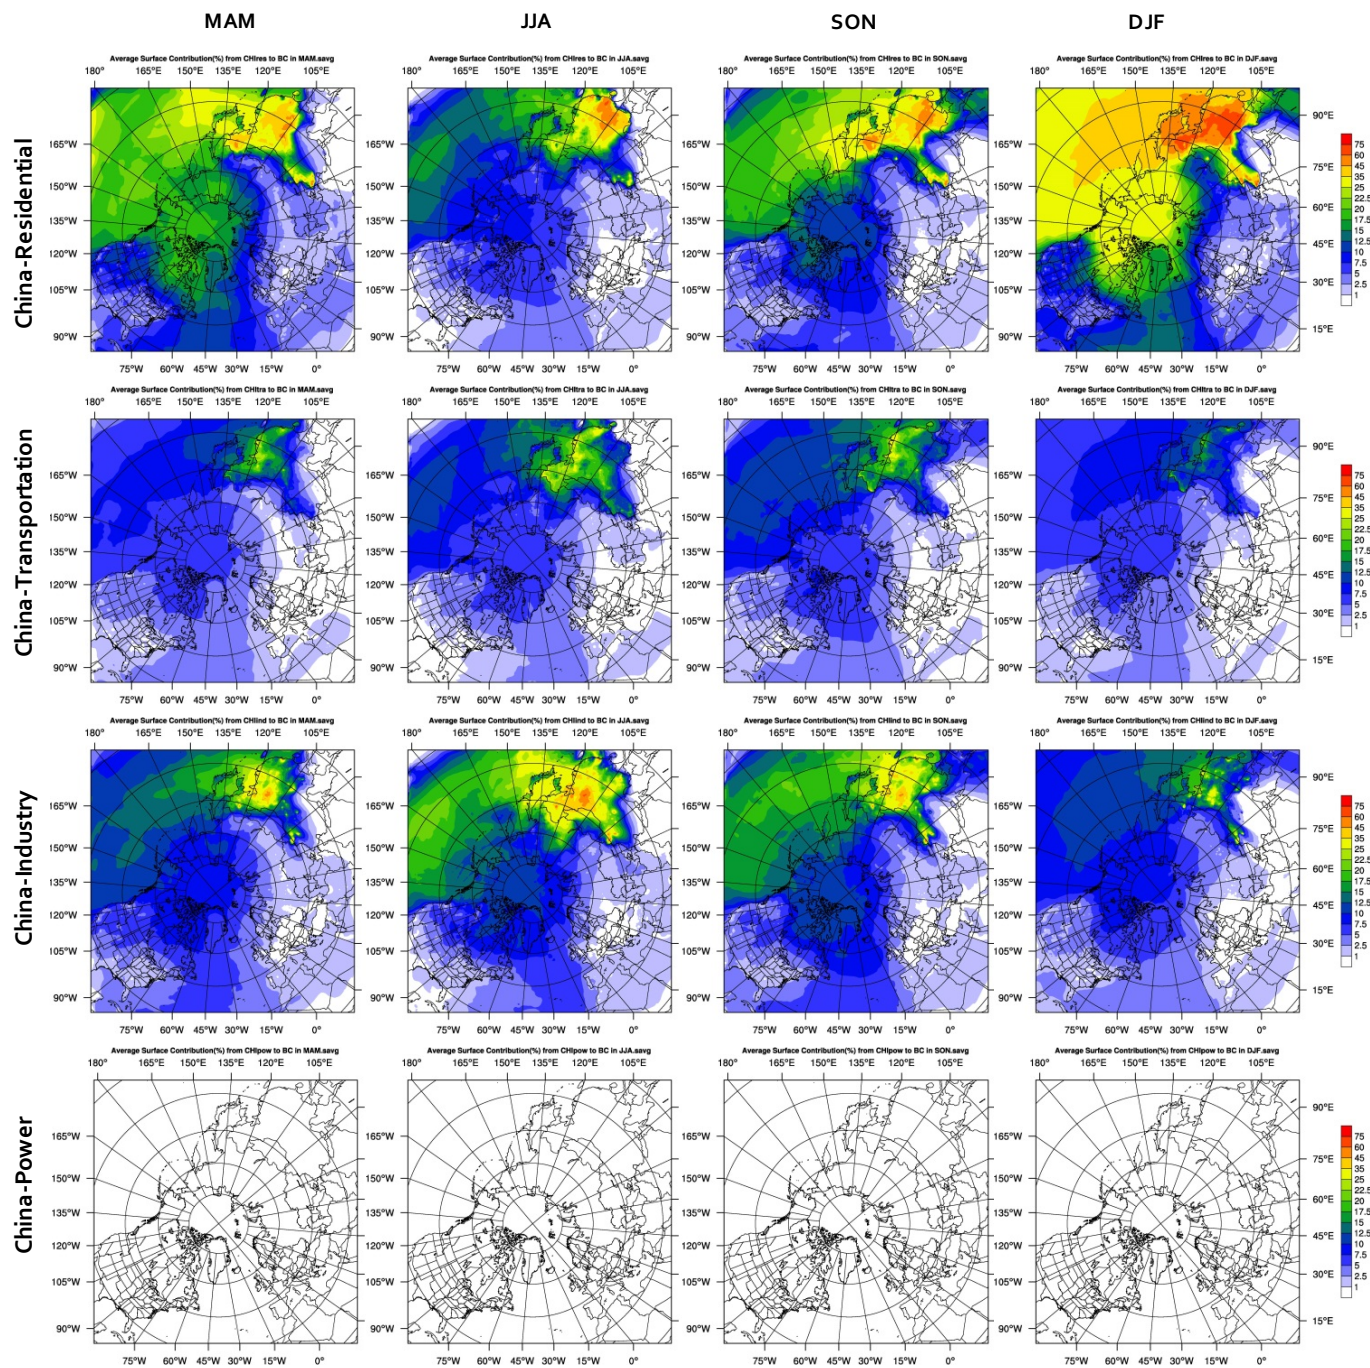

Figure SM 8: Seasonality % contributions of different economic sectors from China to surface BC



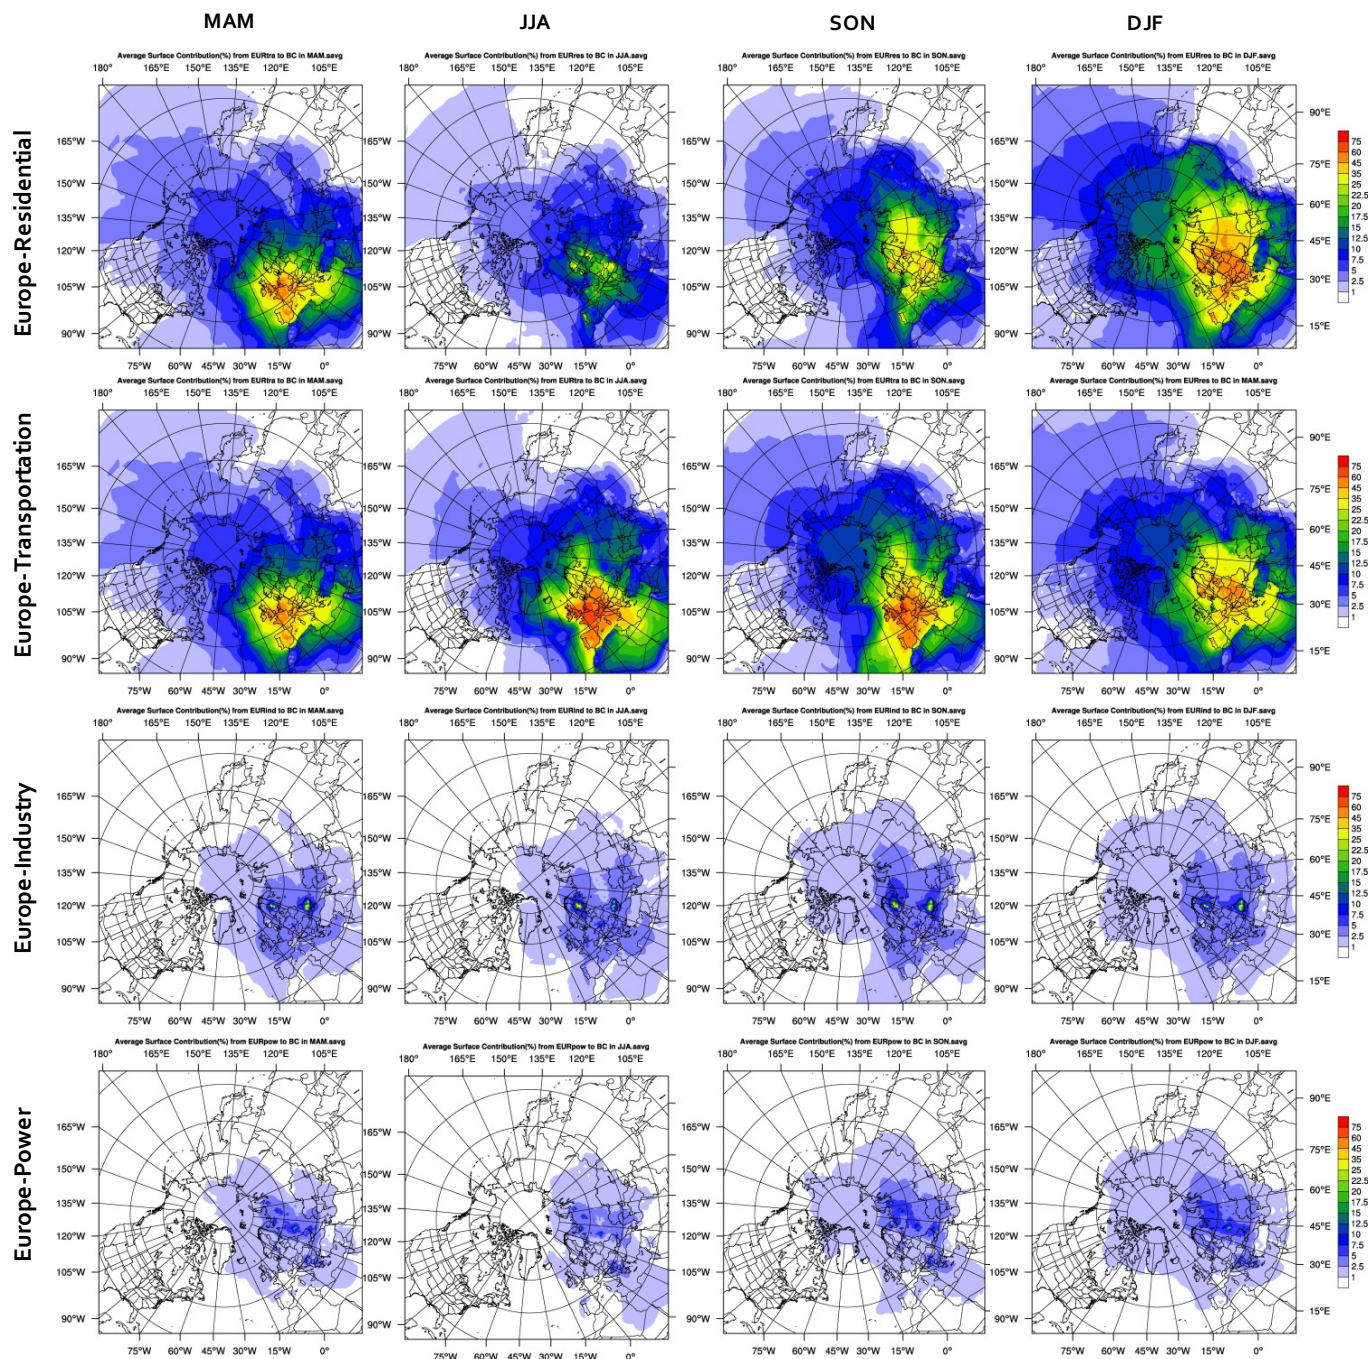

Figure SM 9: Seasonality % contributions of different economic sectors from Europe to surface BC
